# Supplementary material
Source: publisher figshare collection journal article supplement (https://acs.figshare.com/ndownloader/files/10536082)
Supplement: Supplementary file 1 [file 10536082]

# Supporting Information

## *for*

### Enhanced Hydrogen Production from Methanol Photolysis on a Formate Modified Rutile-TiO<sub>2</sub>(110) Surface

Chenbiao Xu<sup>1), a)</sup>, Ruimin Wang<sup>1), a)</sup>, Fei Xu<sup>2), a)</sup>, Qing Guo<sup>1), \*)</sup>, Xing'an Wang<sup>2)</sup>,  
Dongxu Dai<sup>1)</sup>, Hongjun Fan<sup>1), \*)</sup>, Xueming Yang<sup>1), \*)</sup>

<sup>1</sup> *State Key Laboratory of Molecular Reaction Dynamics, Dalian Institute of Chemical Physics, 457  
Zhongshan Road, Dalian 116023, Liaoning, P. R. China*

<sup>2</sup> *Center for Advanced Chemical Physics and Department of Chemical Physics, School of Chemistry  
and Materials Science, University of Science and Technology of China, Jinzhai Road 96, Hefei 230026,  
Anhui Province, P. R. China*

<sup>a)</sup> Authors who made similar contributions to this work.

<sup>\*)</sup> To whom all correspondence should be addressed. Email addresses: [guoqing@dicp.ac.cn](mailto:guoqing@dicp.ac.cn),  
[fanhj@dicp.ac.cn](mailto:fanhj@dicp.ac.cn) and [xmyang@dicp.ac.cn](mailto:xmyang@dicp.ac.cn) (XY).

**TPD spectra for formate and acetate products on the 0.3 ML CD<sub>3</sub>CDO covered R-TiO<sub>2</sub>(110) after irradiating for different times** TPD signals were collected at mass-to-charge ratios ( $m/z$ ) of 28 (CO<sup>+</sup>) and 44 (D<sub>2</sub>CCO<sup>+</sup>) after irradiating the 0.3 ML CD<sub>3</sub>CDO covered TiO<sub>2</sub>(110) surfaces for different irradiation times. The 260 K peak in the TPD spectra of  $m/z = 28$  and 44 is due to the desorption of CD<sub>3</sub>CDO. Bases on our previous works,<sup>1</sup> the 575 K peak in Figure S1A is assigned to CO desorption produced from the decomposition of formate. And the 600 K peak in Figure S1B is assigned to ketone desorption produced from acetate decomposition. The intensity of CO signal is about 20 times bigger than that of ketone, indicating that photoinduced decomposition of CD<sub>3</sub>CDO on R-TiO<sub>2</sub>(110) mainly produces DCOO<sup>-</sup>. The different ratios of the formate and acetate formation channels from CH<sub>3</sub>CHO and CD<sub>3</sub>CDO may be attributed to the isotopic effect. By controlling laser irradiation time, the DCOO<sup>-</sup> pre-covered R-TiO<sub>2</sub>(110) surfaces with different DCOO<sup>-</sup> coverages could be prepared.

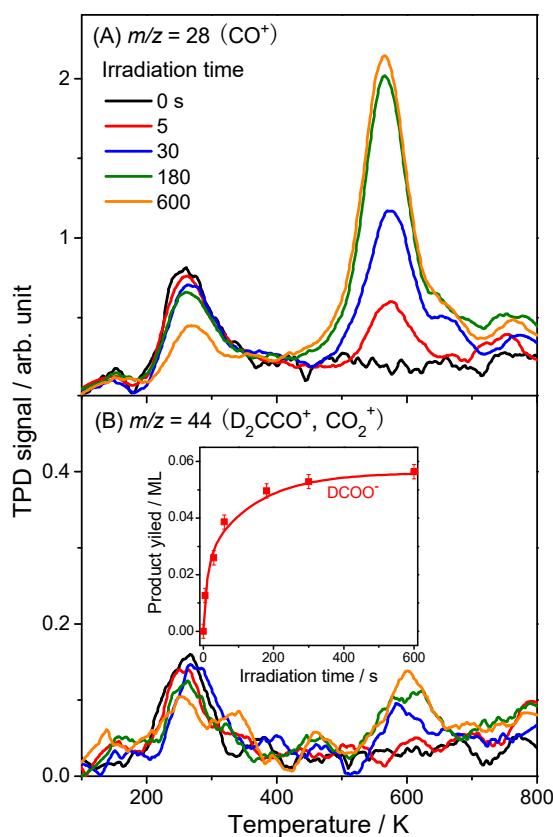

**Figure S1.** TPD spectra acquired at  $m/z = 28$  (CO<sup>+</sup>), 44 (D<sub>2</sub>CCO<sup>+</sup>) after adsorbing 0.3 ML CD<sub>3</sub>CDO at 120 K on the R-TiO<sub>2</sub>(110) surface followed by irradiation for different times. The inset shows the yields of formate (DCOO<sup>-</sup>) product as a function of irradiation time.

**TPD spectra collected at  $m/z = 20$  and  $m/z = 4$  on the 0.3 ML  $\text{CD}_3\text{CDO}$  covered R- $\text{TiO}_2(110)$  after irradiating for different times** TPD signals were collected at mass-to-charge ratios ( $m/z$ ) of 20 ( $\text{D}_2\text{O}^+$ ) and 4 ( $\text{D}_2^+$ ) after irradiating the 0.3 ML  $\text{CD}_3\text{CDO}$  covered  $\text{TiO}_2(110)$  surfaces for different times. As shown in Figure S2A, three main features are observed in the spectra. The peak (marked with \*) centered at 260 K is attributed to the cracking of desorbed  $\text{CD}_3\text{CDO}$  molecules on  $\text{Ti}_{5c}$  sites in the electron-impact ionizer. A new peak observed at about 450 K comes from the thermal recombination desorption of  $\text{D}_2\text{O}$  by the D atoms on BBO sites produced from  $\text{CD}_3\text{CDO}$  decomposition to acetate.<sup>1</sup> The peak centered at 600 K is attributed to the  $\text{DCOO}^-$  decomposition to produce CO and  $\text{D}_2\text{O}$ .<sup>2</sup> Two features are observed in Figure S2B. The peak marked with \* is the cracking of parent molecular  $\text{CD}_3\text{CDO}$ , which is depleted during irradiation by  $\text{CD}_3\text{OD}$  photocatalysis. The peak at 500 K is the molecular  $\text{D}_2$  formed via thermal recombination desorption of D atoms on BBO sites.<sup>3</sup>

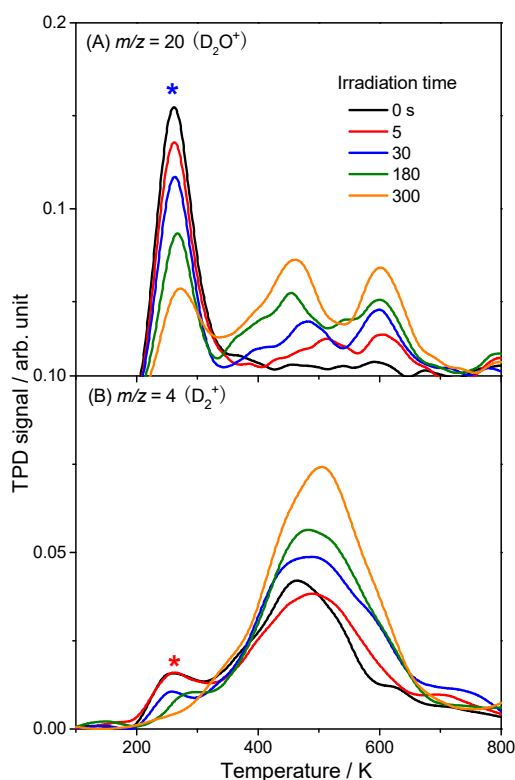

**Figure S2.** TPD spectra acquired at  $m/z = 20$  ( $\text{D}_2\text{O}^+$ ) and 4 ( $\text{D}_2^+$ ) after adsorbing 0.3 ML  $\text{CD}_3\text{CDO}$  at 120 K on the R- $\text{TiO}_2(110)$  surfaces follow by irradiation for different times.

**TPD spectra collected at  $m/z = 28$  on the 0.05 ML DCOO<sup>-</sup> pre-covered R-TiO<sub>2</sub>(110) surfaces with 0.5 ML CD<sub>3</sub>OD adsorption as a function of irradiation time.** TPD signals were collected at mass-to-charge ratios ( $m/z$ ) of 28 (CO<sup>+</sup>) on the 0.05 ML DCOO<sup>-</sup> modified R-TiO<sub>2</sub>(110) surfaces with 0.5 ML CD<sub>3</sub>OD coadsorption as a function of irradiation time. The 0.05 ML DCOO<sup>-</sup> modified R-TiO<sub>2</sub>(110) surfaces were prepared by irradiating the 0.3 ML CD<sub>3</sub>CDO adsorbed R-TiO<sub>2</sub>(110) surfaces for 180 s at 120 K followed by flashing to 400 K to remove CD<sub>3</sub>CDO molecules. The inlet shows the yield of products CO as a function of irradiation time. With increasing irradiation time, the CO peak at 575 K from DCOO<sup>-</sup> decomposition gradually shifts to lower temperature and becomes broader, which may be induced by the BBO<sub>v</sub> sites formed by recombinative D<sub>2</sub>O desorption during the TPD process. However, the area of the CO peak nearly keeps the same for different irradiation times, indicating that the amount of DCOO<sup>-</sup> species does not depleted upon irradiation.

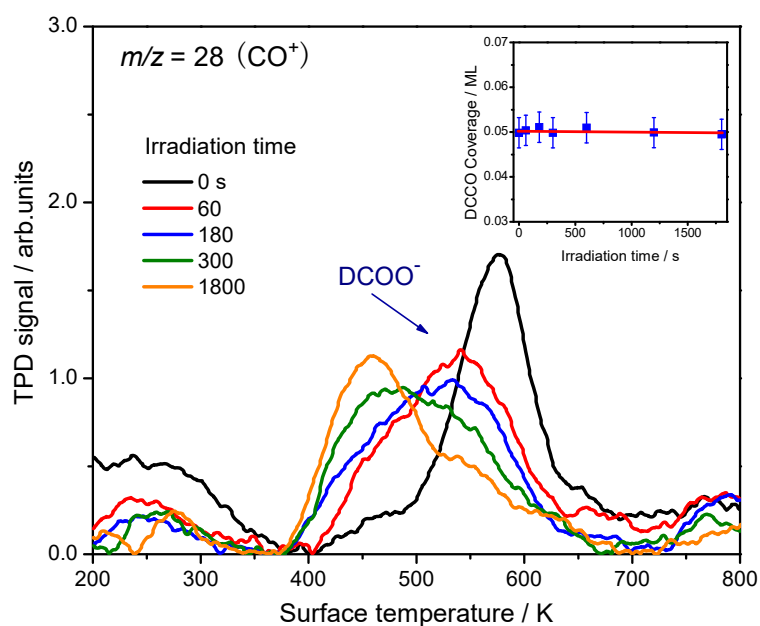

**Figure S3.** TPD spectra collected at  $m/z = 28$  (CO<sup>+</sup>) on the 0.05 ML DCOO<sup>-</sup> pre-covered R-TiO<sub>2</sub>(110) surfaces with 0.5 ML CD<sub>3</sub>OD adsorption as a function of irradiation time. The inlet shows the yield of products CO as a function of irradiation time.

**H<sub>2</sub> formation pathway** For the model with one BBOv and two H<sub>BBO</sub> atoms adsorbed on the surface, the H atom transferring from the BBO site (S4-1) to the BBOv site (S4-3) is endothermic by 0.48 eV, with a barrier of 1.93 eV (TSS4-2). Then the other H atom transferring from the BBO site (S4-3) to the adjacent BBO site (S4-5) is exothermic by -0.09 eV, with a barrier of 1.03 eV (TSS4-4). The barrier for BBO-H and BBOv-H atoms to produce H<sub>2</sub> (TSS4-6) is 0.77 eV. The H<sub>2</sub> desorption energy is 0.35 eV. The rate-determining step is the transfer of H atom from the BBO site to the BBOv site with an overall barrier of 1.93 eV.

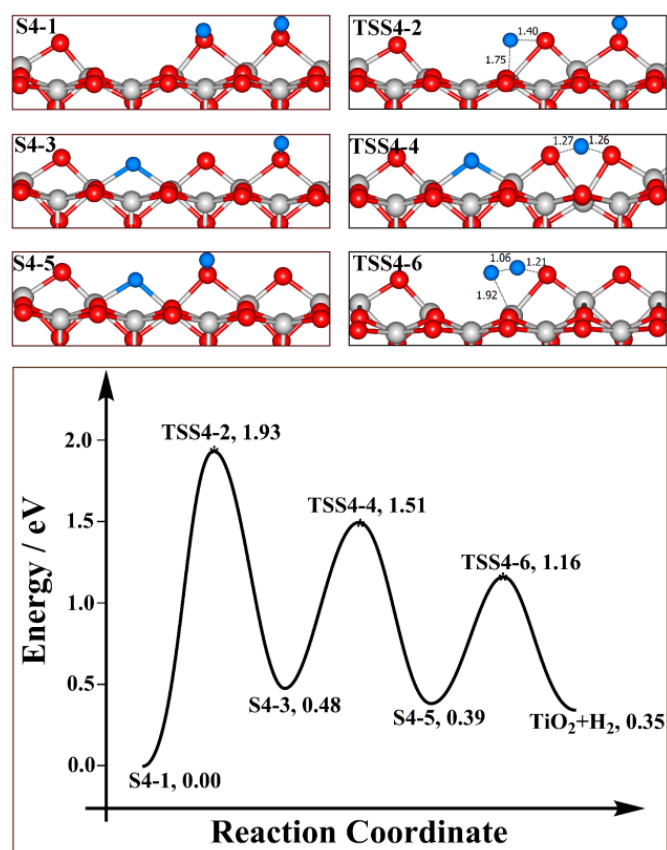

**Figure S4.** Reaction profiles for H<sub>2</sub> formation on the model where one BBOv and two H<sub>BBO</sub> atoms adsorb on the surface. The side views of selected intermediates and transition states are shown in the figure with simplified schematic diagrams.

For the model with one BBOv and three H<sub>BBO</sub> atoms adsorbed on the surface, the H atom transferring from the BBO site (S5-1) to the BBOv site (S5-3) is endothermic by 0.30 eV, with a barrier of 1.82 eV (TSS5-2). The other H atom transferring from the BBO site (S5-3) to adjacent BBO site (S5-5) is exothermic by -0.03 eV, with a barrier of 1.02 eV (TSS5-4). The barrier for BBO-H and BBOv-H atoms to produce H<sub>2</sub> (TSS5-6) is 0.77 eV. The H<sub>2</sub> desorption energy is 0.17 eV. The rate-determining step is the transfer of H atom from the BBO site to the BBOv site with an overall barrier of 1.82 eV.

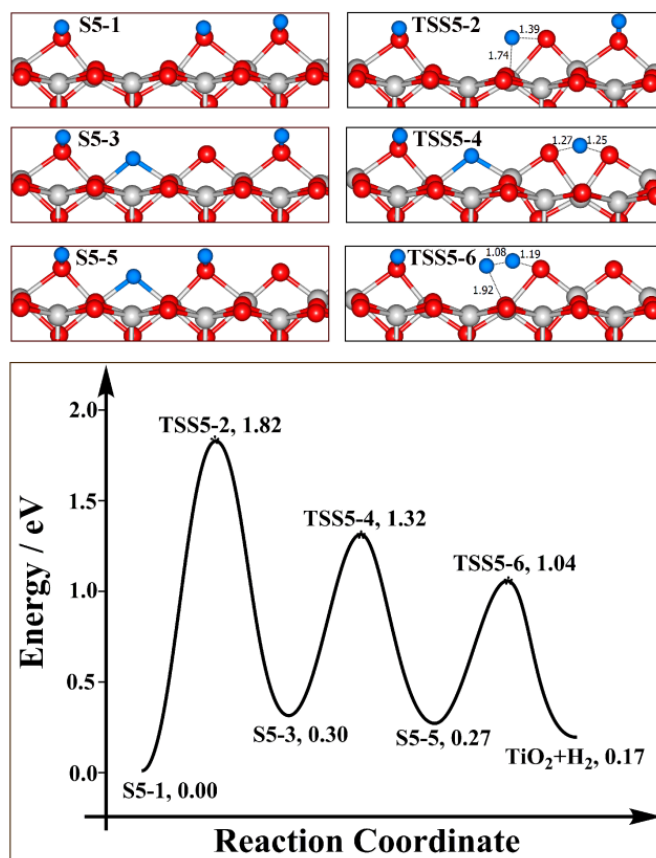

**Figure S5.** Reaction profiles for H<sub>2</sub> formation on the model with one BBOv where one BBOv and three H<sub>BBO</sub> atoms adsorb on the surface. The side views of selected intermediates and transition states are shown in the figure with simplified schematic diagrams.

## References

---

- (S1) Xu, C. B.; Yang, W. S.; Guo, Q.; Dai, D. X.; Yang, X. M. Photoinduced Decomposition of Acetaldehyde on a Reduced TiO<sub>2</sub>(110) Surface: Involvement of Lattice Oxygen. *Phys. Chem. Chem. Phys.* **2016**, *18*, 30982-30989.
- (S2) Henderson, M. A. Complexity in the Decomposition of Formic Acid on the TiO<sub>2</sub>(110) Surface. *J. Phys. Chem. B* **1997**, *101*, 221-229.
- (S3) Xu, C. B.; Yang, W. S.; Guo, Q.; Dai, D. X.; Chen, M. D.; Yang, X. M. Molecular Hydrogen Formation from Photocatalysis of Methanol on TiO<sub>2</sub>(110). *J. Am. Chem. Soc.* **2013**, *135*, 10206-10209.
